# Supplementary material for: Tumour cells are sensitised to ferroptosis via RB1CC1‐mediated transcriptional reprogramming
Source: PubMed Central journal article supplement (PMC8882240; doi:10.1002/ctm2.747), 2022-02-27
Supplement: CTM2-12-e747-s001.pdf [file CTM2-12-e747-s001.pdf]

Supplementary Table 2. Basal information of patients in tissue microarray.

| LUAD patient (N=194) |        |       |
|----------------------|--------|-------|
| Age                  | ≥65    | 99    |
|                      | <65    | 95    |
| Gender               | Male   | 100   |
|                      | Female | 94    |
| Smoking              | Yes    | 89    |
|                      | No     | 105   |
| Stage                | I      | 65    |
|                      | II     | 67    |
|                      | III    | 62    |
| Total                |        | N=194 |

---

| LUSC patient (N=154) |        |       |
|----------------------|--------|-------|
| Age                  |        |       |
|                      | ≥65    | 70    |
|                      | <65    | 84    |
| Gender               |        |       |
|                      | Male   | 86    |
|                      | Female | 68    |
| Smoking              |        |       |
|                      | Yes    | 69    |
|                      | No     | 85    |
| Stage                |        |       |
|                      | I      | 45    |
|                      | II     | 56    |
|                      | III    | 53    |
| Total                |        | N=154 |

---
