# Supplementary material for: Tumour cells are sensitised to ferroptosis via RB1CC1‐mediated transcriptional reprogramming
Source: PubMed Central journal article supplement (PMC8882240; doi:10.1002/ctm2.747), 2022-02-27
Supplement: CTM2-12-e747-s008.pdf [file CTM2-12-e747-s008.pdf]

**Supplementary Table 1. SgRNAs and Primers in the study.**

sgRNA sequence

| Name      | 5'-3'                |
|-----------|----------------------|
| RB1CC1-KO | GGCCGACTCTGACTGAGCCT |
| CHCHD3-KO | GATTGACACAGTGCATATAC |
| ELP3-KO   | GGCACGGATAGCTCTCATGG |

Primers used for plasmid construction

| Name                       | 5'-3'                                                          |
|----------------------------|----------------------------------------------------------------|
| RB1CC1-OV-F                | GCGCGAATTCATGAAGTTATATGTATTTCTGGTTA                            |
| RB1CC1-OV-R                | GCGCGGTACCTTATTTTCAGCATCTTCACCATGTAC                           |
| CHCHD3-OV-F                | GCGCGAATTCATGGGTGGGACCACCAGCACCCGCC                            |
| CHCHD3-OV-R                | GCGCGGTACCTTATCCTCCCTTCTCAAGCATGCTC                            |
| RWT-RB1CC1-FLAG-F          | GCGCGGTACCATGAAGTTATATGTATTTCTGGTTA                            |
| RWT-RB1CC1-FLAG-R          | GCGCGAATTCTCACTTATCGTCGTCATCCTTGTAATCTTATACTTTCTTATTCCATGATACG |
| R $\Delta$ 1-RB1CC1-FLAG-F | GCGCGGTACCATGAAGTTATATGTATTTCTGGTTA                            |
| R $\Delta$ 1-RB1CC1-FLAG-R | GCGCGAATTCTCACTTATCGTCGTCATCCTTGTAATCTTATACTTTCTTATTCCATGATACG |

|                            |                                                                     |
|----------------------------|---------------------------------------------------------------------|
| R $\Delta$ 2-RB1CC1-FLAG-F | GCGCGGTACCATGAAGTTATATGTATTTCTGGTTA                                 |
| R $\Delta$ 2-RB1CC1-FLAG-R | GCGCGAATTCTCACTTATCGTCGTCATCCTTGTAATCTTATACTTTCTTATTCCATGATACG      |
| R $\Delta$ 3-RB1CC1-FLAG-F | GCGCGGTACCATGAAGTTATATGTATTTCTGGTTA                                 |
| R $\Delta$ 3-RB1CC1-FLAG-R | GCGCGAATTCTCACTTATCGTCGTCATCCTTGTAATCTTATACTTTCTTATTCCATGATACG      |
| R $\Delta$ 4-RB1CC1-FLAG-F | GCGCGGTACCATGAAGTTATATGTATTTCTGGTTA                                 |
| R $\Delta$ 4-RB1CC1-FLAG-R | GCGCGAATTCTCACTTATCGTCGTCATCCTTGTAATCTTATACTTTCTTATTCCATGATACG      |
| R $\Delta$ 5-RB1CC1-FLAG-F | GCGCGGTACCATGAAGTTATATGTATTTCTGGTTA                                 |
| R $\Delta$ 5-RB1CC1-FLAG-R | GCGCGAATTCTCACTTATCGTCGTCATCCTTGTAATCTTATACTTTCTTATTCCATGATACG      |
| R $\Delta$ 6-RB1CC1-FLAG-F | GCGCGGTACCATGAAGTTATATGTATTTCTGGTTA                                 |
| R $\Delta$ 6-RB1CC1-FLAG-R | GCGCGAATTCTCACTTATCGTCGTCATCCTTGTAATCTTATACTTTCTTATTCCATGATACG      |
| Y513A-RB1CC1-FLAG-F1       | GCGCGGTACCATGAAGTTATATGTATTTCTGGTTA                                 |
| Y513A-RB1CC1-FLAG-R1       | CCCTGGCGTGTTTTATGAAC                                                |
| Y513A-RB1CC1-FLAG-F2       | GTTCATAAAACACGCCAGGG                                                |
| Y513A-RB1CC1-FLAG-R2       | GCGCGGATCCATGGAGCAGAACTCATCTCTGAAGAGGATCTGATGAAGTTATATGTATTTCTGGTTA |
| Y528A-RB1CC1-FLAG-F1       | GCGCGGTACCATGAAGTTATATGTATTTCTGGTTA                                 |
| Y528A-RB1CC1-FLAG-R1       | TGCTTCAGCTAATCTCTTTC                                                |
| Y528A-RB1CC1-FLAG-F2       | GAAAGAGATTAGCTGAAGCA                                                |
| Y528A-RB1CC1-FLAG-R2       | GCGCGGATCCATGGAGCAGAACTCATCTCTGAAGAGGATCTGATGAAGTTATATGTATTTCTGGTTA |
| S533A-RB1CC1-FLAG-F1       | GCGCGGTACCATGAAGTTATATGTATTTCTGGTTA                                 |

|                              |                                                                     |
|------------------------------|---------------------------------------------------------------------|
| S533A-RB1CC1-FLAG-R1         | GATTCCCTTTTTGCTTTTTTC                                               |
| S533A-RB1CC1-FLAG-F2         | GAAAAAGCAAAAAGGGAATC                                                |
| S533A-RB1CC1-FLAG-R2         | GCGCGGATCCATGGAGCAGAACTCATCTCTGAAGAGGATCTGATGAAGTTATATGTATTTCTGGTTA |
| S537A-RB1CC1-FLAG-F1         | GCGCGGTACCATGAAGTTATATGTATTTCTGGTTA                                 |
| S537A-RB1CC1-FLAG-R1         | AATTTCCCAAAGGCTTCCCT                                                |
| S537A-RB1CC1-FLAG-F2         | AGGGAAGCCTTTGGGAAATT                                                |
| S537A-RB1CC1-FLAG-R2         | GCGCGGATCCATGGAGCAGAACTCATCTCTGAAGAGGATCTGATGAAGTTATATGTATTTCTGGTTA |
| S545A-RB1CC1-FLAG-F1         | GCGCGGTACCATGAAGTTATATGTATTTCTGGTTA                                 |
| S545A-RB1CC1-FLAG-R1         | TCTTAAAAAAGCCTTCCTAA                                                |
| S545A-RB1CC1-FLAG-F2         | TTAGGAAGGCTTTTTTAAGA                                                |
| S545A-RB1CC1-FLAG-R2         | GCGCGGATCCATGGAGCAGAACTCATCTCTGAAGAGGATCTGATGAAGTTATATGTATTTCTGGTTA |
| S537E-RB1CC1-FLAG-F1         | GCGCGGTACCATGAAGTTATATGTATTTCTGGTTA                                 |
| S537E-RB1CC1-FLAG-R1         | AATTTCCCAAACCTTCCCT                                                 |
| S537E-RB1CC1-FLAG-F2         | AGGGAAGAGTTTGGGAAATT                                                |
| S537E-RB1CC1-FLAG-R2         | GCGCGGATCCATGGAGCAGAACTCATCTCTGAAGAGGATCTGATGAAGTTATATGTATTTCTGGTTA |
| RB1CC1 <sup>ΔC</sup> -FLAG-F | GCGCGGTACCATGAAGTTATATGTATTTCTGGTTA                                 |
| RB1CC1 <sup>ΔC</sup> -FLAG-R | GCGCGAATTCTCACTTATCGTCGTCATCCTTGTAATCAGATACTGAAGACATGCTCT           |
| ELP3 <sup>WT</sup> -MYC-F    | GCGCAAGCTTATGAGGCAGAAGCGGAAAGG                                      |
| ELP3 <sup>WT</sup> -MYC-R    | GCGCGAATTCAGATCCTCTTCAGAGATGAGTTTCTGCTCTTATTTTCAGCATCTTCACCA        |

|                           |                                                              |
|---------------------------|--------------------------------------------------------------|
| ELP3 <sup>ΔC</sup> -MYC-F | GCGCAAGCTTATGAGGCAGAAGCGGAAAGG                               |
| ELP3 <sup>ΔC</sup> -MYC-R | GCGCGAATTCCAGATCCTCTTCAGAGATGAGTTTCTGCTCGGCTAGGATCCGAGCCACCA |

---

Primers for qPCR

---

| Name          | 5'-3'                      |
|---------------|----------------------------|
| TPBG-qPCR-F   | CTGAAGATGAGCGGCAGAACCGGAG  |
| TPBG-qPCR-R   | CAGTCGCAGACCCAGGGATTGTTGT  |
| EPRS1-qPCR-F  | TCATTGCCTGTCTCTGAGAACATAC  |
| EPRS1-qPCR-R  | GTGCCACTCGAGCTTTGGTTGTTGA  |
| NAMPT -qPCR-F | AATCCAGGAAGCCAAAGATGTCTAC  |
| NAMPT -qPCR-R | TGGCCACTGTGATTGGATAACCAGGA |
| FOSL1-qPCR-F  | TGGTGCCAAGCATCAACACCATGAG  |
| FOSL1-qPCR-R  | CCGGGCTGATCTGTTTACAAGGCCT  |
| LZTFL1-qPCR-F | AGAGTTGGGCCTAAATGAGCA      |
| LZTFL1-qPCR-R | CACAGCTTGTAATCCATTGAGGA    |
| RB1CC1-qPCR-F | GAAAGAGCTTGCTCAGGGATT      |
| RB1CC1-qPCR-R | TCATCAACTGATTTGCGTGACT     |
| RB1-qPCR-F    | CTCTCGTCAGGCTTGAGTTTG      |
| RB1-qPCR-R    | GACATCTCATCTAGGTCAACTGC    |

|                 |                          |
|-----------------|--------------------------|
| CHCHD3-qPCR-F   | GAGGCGGACGAGAATGAGAAC    |
| CHCHD3-qPCR-R   | ACCAGAATACCGCTGAGACTTC   |
| VRK3-qPCR-F     | AAGTTCTCACTCAAACCTGGATGC |
| VRK3-qPCR-R     | TGGGGTTCGAGTACAGCTTCTT   |
| TPD52-qPCR-F    | AGCATCTAGCAGAGATCAAGCG   |
| TPD52-qPCR-R    | AGCCAACAGACGAAAAAGCAG    |
| SLC25A32-qPCR-F | TCCCCACACCGACAATATAAAGG  |
| SLC25A32-qPCR-R | CCATGCGATGTTCCAAACAGC    |
| MYC-qPCR-F      | GTCAAGAGGGCGAACACACAAC   |
| MYC-qPCR-R      | TTGGACGGACAGGATGTATGC    |
| CYTH3-qPCR-F    | GTGCTACGTGCTGTCATTTCG    |
| CYTH3-qPCR-R    | TGGCGATGAACCGTTCTGC      |
| MEPCE-qPCR-F    | ACACCTGAGTATGATGTGGTGC   |
| MEPCE-qPCR-R    | GTAGATCCGGCGAAACATGC     |
| CYREN-qPCR-F    | AGGACTGTGTACTGCATGAATG   |
| CYREN-qPCR-R    | AACTTGTGTGAGGCGACACG     |
| SEC13-qPCR-F    | CCTGGCATCGTGCTCCTATG     |
| SEC13-qPCR-R    | GGATCAGGCCGTAGTCATGG     |
| GAPDH-qPCR-F    | GGAGCGAGATCCCTCCAAAAT    |

GAPDH-qPCR-R

GGCTGTTGTCATACTTCTCATGG

---

Primers for ChIP-qPCR

---

| Name           | 5'-3'                     |
|----------------|---------------------------|
| RBR-ChIP-F     | CCGCCCAAGGAGGGAGAGTG      |
| RBR-ChIP-R     | CGGGCTGGGACGCTAAGTCA      |
| NCR-ChIP-F     | TCCTGCAAAGGACATGATCTCATTC |
| NCR -ChIP-R    | GTAGGGATGGCAGGAAAGTGAAGGA |
| Chr3-p-ChIP-F  | CAATCTCGCCAGCGTCTGAT      |
| Chr3-p-ChIP-R  | TTCCACAGTGGCTTCACTGA      |
| Chr7-p1-ChIP-F | ACAGAGTGAGACTCCATCTC      |
| Chr7-p1-ChIP-R | CTTCTTACTTGAGTTTCCTG      |
| Chr7-p2-ChIP-F | ATCCATATGTACCAAATGAC      |
| Chr7-p2-ChIP-R | TTCCTTAATGTGCATTTCTT      |
| Chr8-p-ChIP-F  | GTTTGGAAATAGTCTGGCAC      |
| Chr8-p-ChIP-R  | CTTTGGGACAATAGTTTGCA      |
| Chr19-p-ChIP-F | GTAAGGCTACCAGGCACCAT      |
| Chr19-p-ChIP-R | ATAGTTAACGGTAAGACTTA      |

|                |                      |
|----------------|----------------------|
| ATP6V0A-ChIP-F | GTGGACTTTTCTCTGTGCAT |
| ATP6V0A-ChIP-R | CGTGGTGGTGCATGCCTGTA |

---

Primers for 3C assays

---

| Name                | 5'-3'                       |
|---------------------|-----------------------------|
| Chr3/SEC13-3C-F     | CTTCACAATCTCGCCAGCGTCTGAT   |
| Chr3/SEC13-3C-R     | CTTGGCCTTATCACCTAGAAAGTCA   |
| Chr7p1/MEPCE-3C-F   | TAAGGCAGGAGAATTGCTTGAATCT   |
| Chr7p1/MEPCE-3C-R   | CTGCCGCGCGATCCCACCCACCGTA   |
| Chr7p1/CYREN-3C-F   | TAAGGCAGGAGAATTGCTTGAATCT   |
| Chr7p1/CYREN-3C-R   | GGAGTCTGCAGGACCTGGCTGCGAA   |
| Chr7p1/CHCHD3-3C-F  | TAAGGCAGGAGAATTGCTTGAATCT   |
| Chr7p1/CHCHD3-3C-R  | CAGAATATAACCCTTCACCTGGAATG  |
| Chr7p2/CYTH3-3C-F   | GTACTIONAAGATTTTTAAGTGCCATA |
| Chr7p2/CYTH3-3C-R   | AAGCATTATAATTGATAGTATCTT    |
| Chr8p/TPD52-3C-F    | ACCAGTCATTGATGAATAGATGATG   |
| Chr8p/TPD52-3C-R    | GATGTTTATTTCTATACAATAGATCTC |
| Chr8p/SLC25A32-3C-F | CTGTAAAGACAGCACCTAGCACATA   |
| Chr8p/SLC25A32-3C-R | TCACAAGACTCAATTATCTGTTTCA   |

|                 |                           |
|-----------------|---------------------------|
| Chr8p/MYC-3C-F  | GTGCGTCTCCGAGATAGCAGGGGAC |
| Chr8p/MYC-3C-R  | TCACAAGACTCAATTATCTGTTTCA |
| Chr19/VRK3-3C-F | CAGGTCCCCTTGGCACCAAGGCAAT |
| Chr19/VRK3-3C-R | GTATTGAGTACAGAGGTTTAGTATG |

---

Primers for luciferase reporter gene experiments

---

| Name            | 5'-3'                           |
|-----------------|---------------------------------|
| WT-Chr3p-Luc-F  | GCGCGGTACCCAATCTCGCCAGCGTCTGAT  |
| WT-Chr3p-Luc-R  | GCGCCTCGAGTTCCACAGTGGCTTCACTGA  |
| WT-Chr7p1-Luc-F | GCGCGGTACCTGTAGTCCATGTA CTCAAGA |
| WT-Chr7p1-Luc-R | GCGCCTCGAGAGCAAACAGCTGTTTGCTGC  |
| WT-Chr7p2-Luc-F | GCGCGGTACCCTGGGTGACAGAGTGAGACT  |
| WT-Chr7p2-Luc-R | GCGCCTCGAGCTTCTTACTTGAGTTTCCTG  |
| WT-Chr8p-Luc-F  | GCGCGGTACCCTTGCATCCAGGTAGGAGGT  |
| WT-Chr8p-Luc-R  | GCGCCTCGAGCATGCTCTCTAGGCAGGTAG  |
| WT-Chr19p-Luc-F | GCGCGGTACCACAGTGAGTGATATGCAATG  |
| WT-Chr19p-Luc-R | GCGCCTCGAGATCATGTATTGAGTACAGAG  |

---
